# Supplementary material
Source: PubMed Central journal article supplement (PMC2898377)
Supplement: supp_M110.125724_jbc.M110.125724-1.pdf [file supp_M110.125724_jbc.M110.125724-1.pdf]

Figure S1

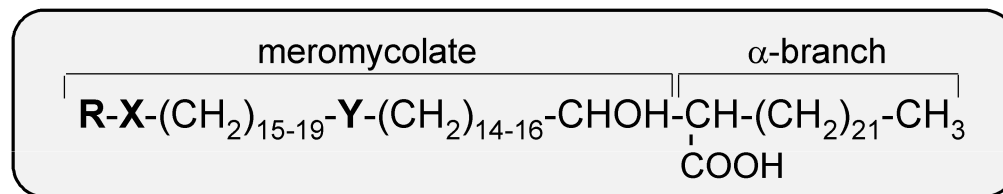

| Mycolate type | R                                  | X                                                                                              | Y                                                                                                                                                                                           |
|---------------|------------------------------------|------------------------------------------------------------------------------------------------|---------------------------------------------------------------------------------------------------------------------------------------------------------------------------------------------|
| $\alpha$      | $\text{CH}_3(\text{CH}_2)_{15-19}$ | 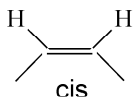<br>cis     | <br>cis    or <br>cis |
| $\alpha'$     | -                                  | $\text{CH}_3(\text{CH}_2)$                                                                     | <br>trans                                                                                                |
| epoxy         | $\text{CH}_3(\text{CH}_2)_{15-17}$ | <br>trans | <br>cis                                                                                                 |

**Structures of the major mycolic acids of *M. smegmatis*.** X and Y represent the positions of the distal and proximal functional groups relative to the carboxyl group, respectively.

Figure S2

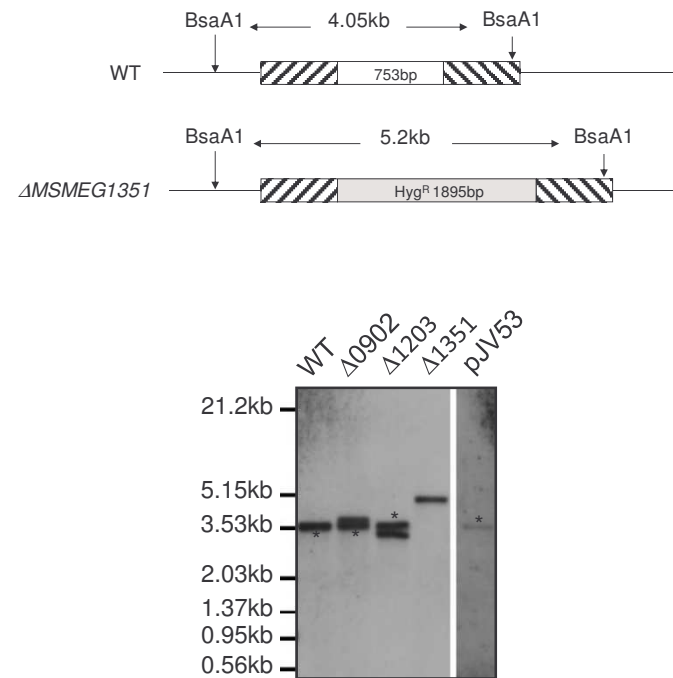

**Disruption of *MSMEG\_1351* in *Msm* by a hygromycin resistance cassette.** BsaA1 restriction site and probe location are indicated. The same strategy was followed for the construction of  $\Delta MSMEG_{0902}$  and  $\Delta MSMEG_{1203}$ . The Southern blot of BsaA1-digested genomic DNA in the indicated strains was performed using a hygromycin probe. The band marked with \* corresponds to non-specific labeling of a 3611-bp BsaA1-fragment of the pJV53 vector. This band is absent from the  $\Delta MSMEG_{1351}$  mutant in which pJV53 has been cured. Predicted sizes for  $\Delta MSMEG_{0902}$ ,  $\Delta MSMEG_{1203}$  and  $\Delta MSMEG_{1351}$  were 3.85kb, 3.2kb, and 5.2kb, respectively.

Figure S3

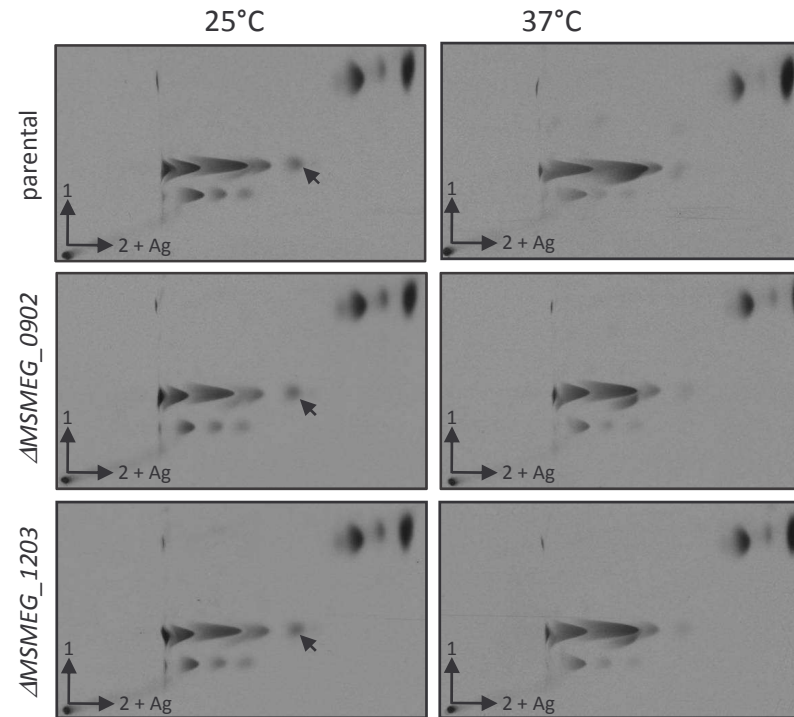

**Mycolic acid analysis of *MSMEG\_0902* and *MSMEG\_1203* disrupted *M. smegmatis* mutants.** *MSMEG\_0902* and *MSMEG\_1203* genes were inactivated by introducing a hygromycin resistance cassette, following the same strategy used to inactivate *MSMEG\_1351*. The parental strain, the  $\Delta MSMEG_0902$  and  $\Delta MSMEG_1203$  mutants were either grown at 25°C or at 37°C and labeled with  $^{14}\text{C}$ -acetate. Mycolic acids were then extracted and resolved by 2D argention-TLC. The arrowhead indicates the position of cyclopropanated  $\alpha$ -mycolic acids that accumulate at 25°C, not only in the parental strain but also in the two mutants.

Figure S4

A

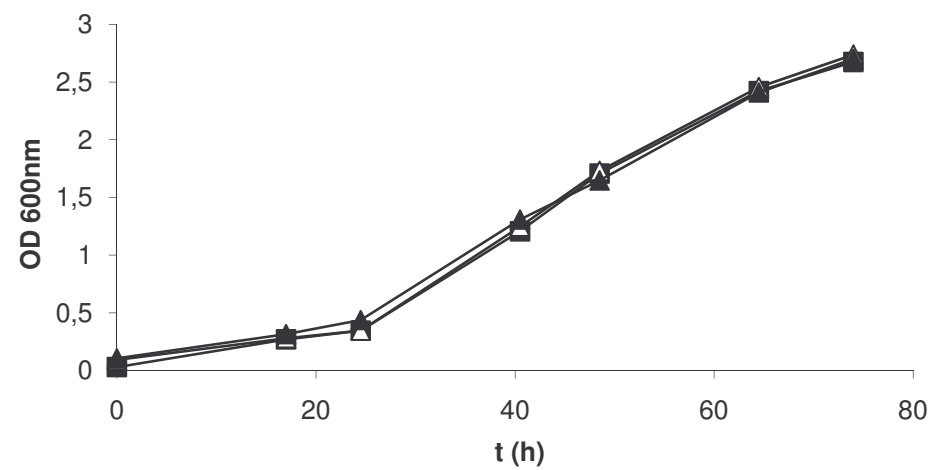

B

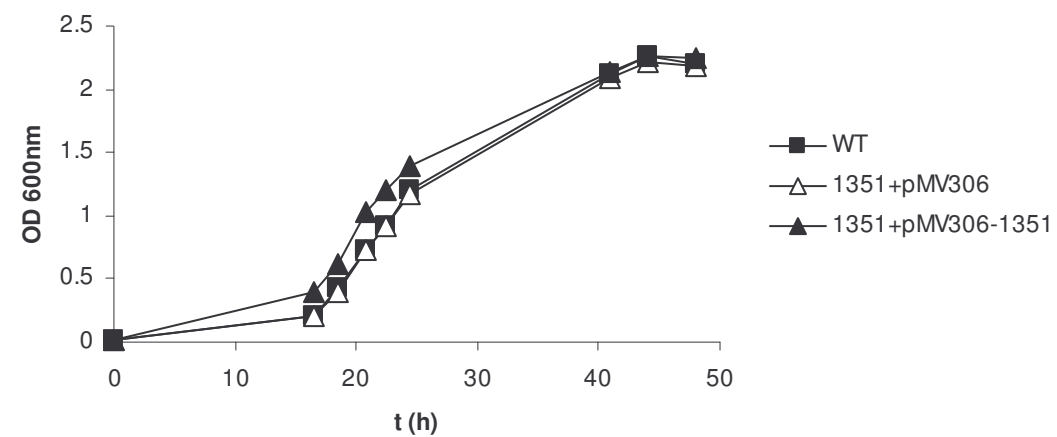

Growth curves of *M. smegmatis* strains at 25°C (A) or 37°C (B).
