# Supplementary material
Source: PubMed Central journal article supplement (PMC2898377)
Supplement: supp_M110.125724_jbc.M110.125724-2.pdf [file supp_M110.125724_jbc.M110.125724-2.pdf]

**Table S1.** Bacterial strains and plasmids used in this study

| Strains              | Description                                                                                                                                                                                                                                      | Marker | Reference      |
|----------------------|--------------------------------------------------------------------------------------------------------------------------------------------------------------------------------------------------------------------------------------------------|--------|----------------|
| <i>E. coli</i> TOP10 | F <sup>-</sup> <i>mcrA</i> $\Delta$ ( <i>mrr-hsdRMS-mcrBC</i> ) $\phi$ 80/ <i>lacZ</i> $\Delta$ M15 $\Delta$ <i>lacX74 deoR recA1 araD139 <math>\Delta</math>(<i>ara-leu</i>)7697 <i>galU galK rpsL endA1 nupG</i>; used for general cloning</i> | -      | Invitrogen     |
| <i>M. smegmatis</i>  | strain mc <sup>2</sup> 155                                                                                                                                                                                                                       | -      | (1)            |
| $\Delta$ MSMEG_1351  | mc <sup>2</sup> 155 MSMEG_1351:: <i>hyg</i>                                                                                                                                                                                                      | Hyg    | This study     |
| <i>M. bovis</i> BCG  | strain Pasteur 1173P2 (referred to as BCG Pasteur)                                                                                                                                                                                               | -      | WHO, Stockholm |
| mc <sup>2</sup> 2801 | BCG Pasteur <i>pcaA</i> ::Tn5370                                                                                                                                                                                                                 | Hyg    | (2)            |
| Plasmids             | Description                                                                                                                                                                                                                                      | Marker | Reference      |
| pMV306               | <i>attB</i> site specific integrating vector                                                                                                                                                                                                     | Km     | (3)            |
| pMV306_1351          | MSMEG_1351 gene cloned in pMV306                                                                                                                                                                                                                 | Km     | This study     |
| pMV261               | Multi-copy plasmid for <i>E.coli</i> and mycobacteria. Cloned genes are under the control of the constitutive <i>hsp60</i> promoter                                                                                                              | Km     | (3)            |
| pMV261_1351          | MSMEG_1351 gene cloned in pMV261                                                                                                                                                                                                                 | Km     | This study     |
| pMV261_1351_1351     | <i>pcaA</i> gene cloned in pMV261                                                                                                                                                                                                                | Km     | (4)            |

## References

1. Snapper, S. B., Melton, R. E., Mustafa, S., Kieser, T., and Jacobs, W. R., Jr. (1990) *Mol Microbiol* **4**(11), 1911-1919
2. Glickman, M. S., Cox, J. S., and Jacobs, W. R., Jr. (2000) *Mol Cell* **5**(4), 717-727
3. Stover, C. K., de la Cruz, V. F., Fuerst, T. R., Burlein, J. E., Benson, L. A., Bennett, L. T., Bansal, G. P., Young, J. F., Lee, M. H., Hatfull, G. F., and et al. (1991) *Nature* **351**(6326), 456-460
4. Alahari, A., Trivelli, X., Guerardel, Y., Dover, L. G., Besra, G. S., Sacchetti, J. C., Reynolds, R. C., Coxon, G. D., and Kremer, L. (2007) *PLoS ONE* **2**(12), e1343

**Table S2.** Primers used for AES.

| <b>Primer name</b> | <b>Sequence</b>                             | <b>Amplified product</b>   |
|--------------------|---------------------------------------------|----------------------------|
| MSMEG0902kontF     | GTGATCTTGTTCTTCTTAAGCAGGAAGTGAC<br>GCCCCG   | <i>MSMEG0902</i> left arm  |
| MSMEG0902kontR     | CAGCGTCATCCCGTCTAGAGGCGAAGTACGC<br>ACAGCTG  |                            |
| MSMEG0902koctF     | CTGATCAGCGTCCCGCTAGCGGGCAGGCGTC<br>CTCGGC   | <i>MSMEG0902</i> right arm |
| MSMEG0902koctR     | CCAGCAGACCAAGAAGCTTCTGGTGAGCTACA<br>GCGAC   |                            |
| MSMEG1203kontF     | CAACGTCATCGGGCTTAAGCTGTGCACAATC<br>AGCGC    | <i>MSMEG1203</i> left arm  |
| MSMEG1203kontR     | AAATACGGCCGCATCTAGACAGTGCCGACGC<br>CGTCAGC  |                            |
| MSMEG1203koctF     | CGGGATCTCCGAGCTAGCACAGTTCGCCTAC<br>ACGAA    | <i>MSMEG1203</i> right arm |
| MSMEG1203koctR     | GGCCGGCGCGCTGAAGCTTGTGAGACCGAG<br>GAGCACG   |                            |
| MSMEG1351kontF     | TCGGGGTGATCTTCTTAAGCAACAACCAGGCG<br>CTCCT   | <i>MSMEG1351</i> left arm  |
| MSMEG1351kontR     | AGGTTCTCGACGGGTCTAGAAACAGCGCGAA<br>GAAGTCGT |                            |
| MSMEG1351koctF     | GCGTTCGCGTCGGCTAGCTCGACGTCAACC<br>AGTTCAC   | <i>MSMEG1351</i> right arm |
| MSMEG1351koctR     | ACCTTCTCGTCGAAAGCTTCCCAGCCCTGCAG<br>GCGG    |                            |
